# Supplementary material
Source: PubMed Central journal article supplement (PMC7860120)
Supplement: develop-148-193409-s1.pdf [file develop-148-193409-s1.pdf]

### Supplemental Figure 1

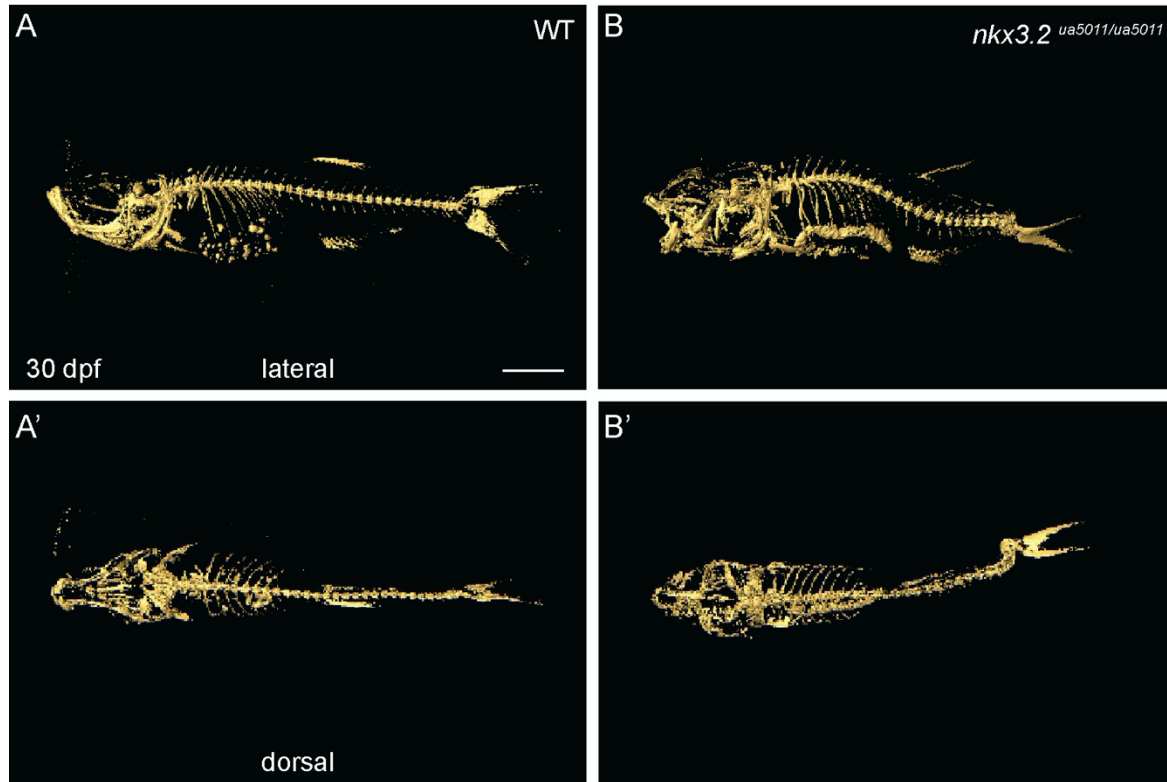

**Figure S1.** *nkx3.2* mutant zebrafish develop spinal abnormalities at 30 dpf. Lateral and dorsal views of  $\mu$ CT imaging of 30 dpf wild-type (WT, A) and *nkx3.2<sup>ua5011/ua5011</sup>* mutant (B) fish reveals spinal abnormalities in mutants, including a kink in the caudal spine. Scale bar = 2mm.

## Supplemental Figure 2

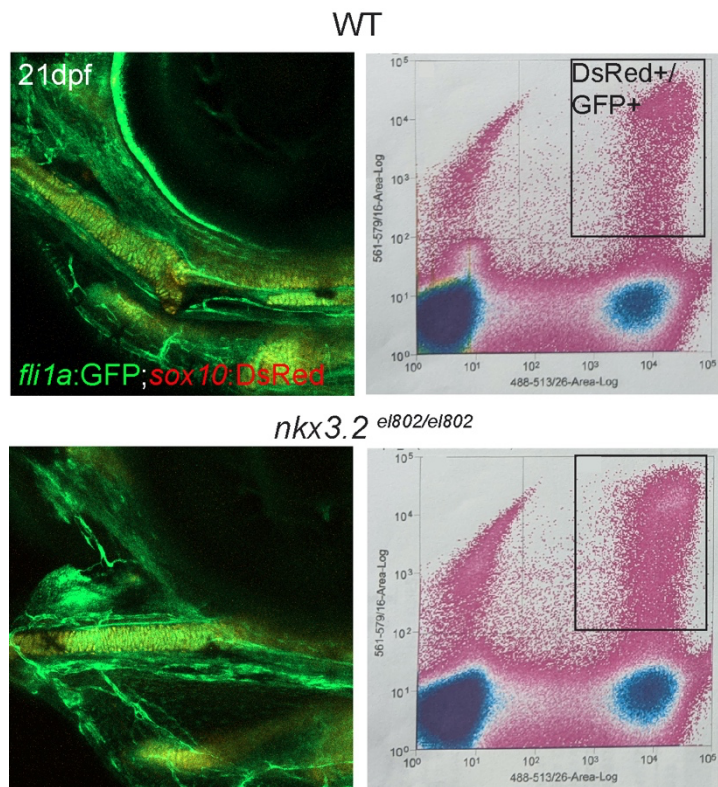

**Figure S2. Fluorescence activated cell sorting (FACS) for single-cell isolation of *fli1a:GFP* +;*sox10:DsRed* + populations.** Confocal images to the left show *fli1a:GFP* +;*sox10:DsRed* + chondrocytes in the jaw region at 21 dpf. FACS plots to the right show gating for GFP (x-axis) and DsRed (y-axis), with cells in the upper right quadrant (boxed) used for single-cell analysis.

## Supplemental Figure 3

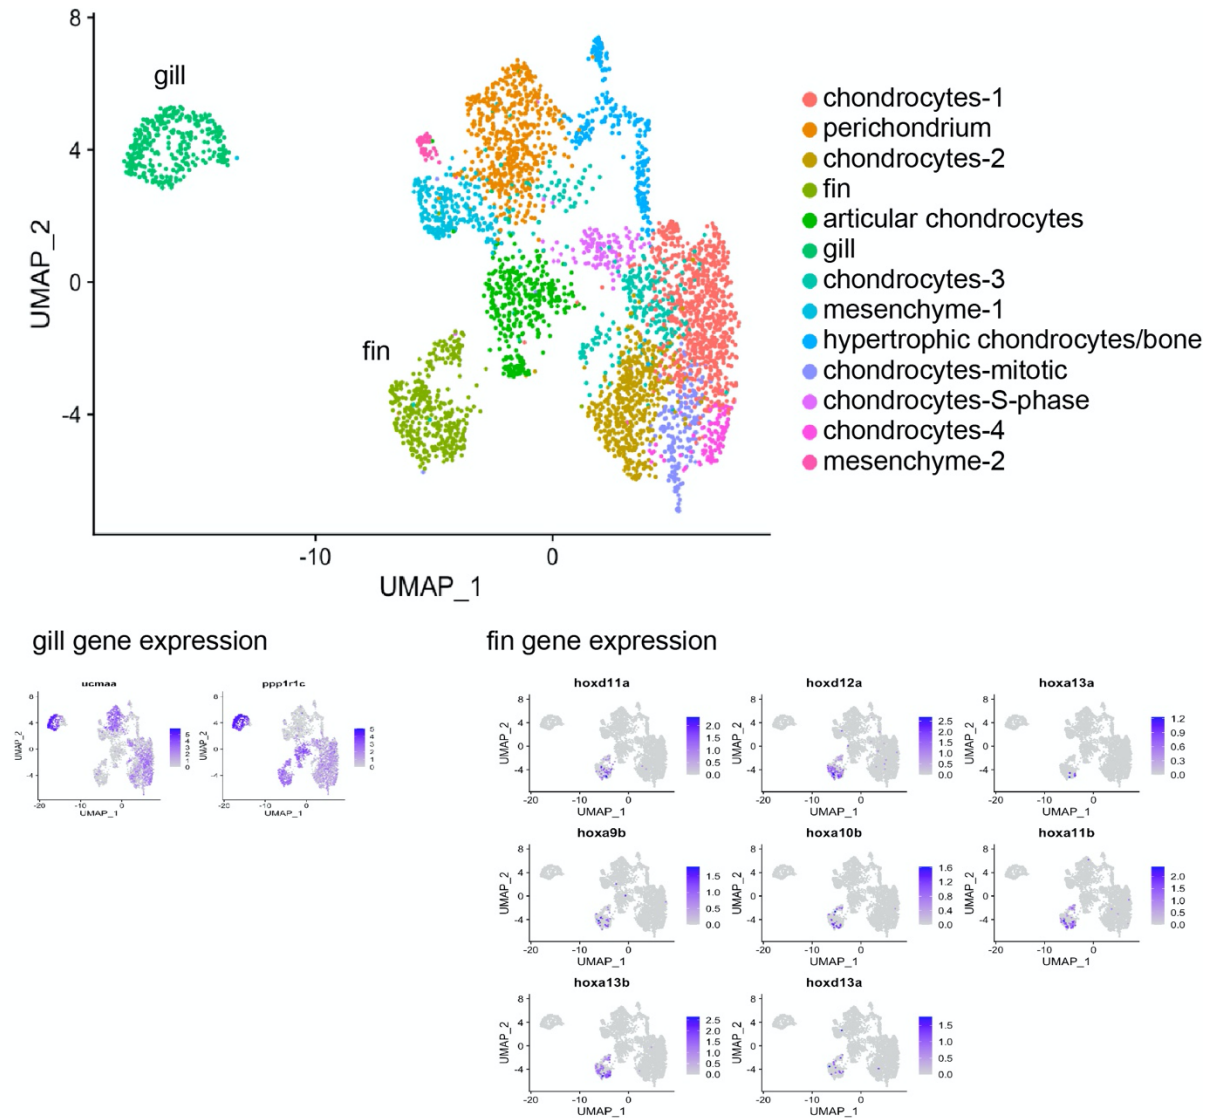

**Figure S3. Identification of fin and gill populations in single-cell RNA-seq analysis.** Fin and gill cells are present in unique clusters in the UMAP visualization of all profiled cells. Gill cells are marked by high levels of expression of *ucmaa* and *ppp1r1c*. Fin cells are marked by expression of posterior *hox9-13* genes. Although we attempted to isolate only head chondrocytes, this analysis reveals some contamination by pectoral fin chondrocytes during the dissection process.
